# Supplementary material
Source: HighWire-hosted journal article supplement (https://bmjopen.bmj.com/content/14/3/e079131)
Supplement: inline-supplementary-material-1 [file inline-supplementary-material-1.pdf]

## Supplementary tables

Supplemental Table 1. Definitions and sources of variables

|                                     | Definition                                                                                                                                                                       | Source |
|-------------------------------------|----------------------------------------------------------------------------------------------------------------------------------------------------------------------------------|--------|
| Maternal age (years)                | Mother's age (in years) calculated at date of delivery.                                                                                                                          | BCPDR  |
| Nullipara                           | Mother has never delivered a baby of at least 500 grams birth weight or at least 20 weeks gestation in a previous pregnancy.                                                     | BCPDR  |
| Pre-existing diabetes               | Pre-existing diabetes mellitus Type 1 or Type 2, insulin used.                                                                                                                   | BCPDR  |
|                                     | Pre-existing diabetes mellitus Type 1 or Type 2, insulin not used;<br>or 'E10','E11', 'O245','O246','O247'                                                                       | ICD-10 |
| Chronic hypertension                | 'O10','O11'                                                                                                                                                                      | ICD-10 |
| Prior stillbirth<br>/neonatal death | Mother had at least one prior live born infant, who died within the first 28 days of life.                                                                                       | BCPDR  |
|                                     | Mother had at least one prior stillbirth or intrauterine death documented.                                                                                                       |        |
| IVF conception                      | Mother had in-vitro fertilization to achieve the current pregnancy.                                                                                                              | BCPDR  |
| Multiple gestation                  | The incremental sequence number of babies born from the current pregnancy. Should be used with multiple_birth_count. Along with mother_id, required to link to MULTIPLE_LABOURS. | BCPDR  |

|                                              |                                                                                                                              |       |
|----------------------------------------------|------------------------------------------------------------------------------------------------------------------------------|-------|
| Antepartum bleeding                          |                                                                                                                              |       |
| < 20 weeks                                   | Mother had any antepartum bleeding in pregnancy < 20 weeks gestation.                                                        | BCPDR |
| Antepartum                                   |                                                                                                                              |       |
| bleeding or<br>hemorrhage ≥ 20<br>weeks      | Mother had any antepartum hemorrhage or bleeding in pregnancy ≥ 20 weeks gestation, including bleeding from cervical polyps. | BCPDR |
| Intrauterine Growth Restriction <sup>a</sup> |                                                                                                                              |       |
|                                              | Health care provider identified intrauterine growth restriction (IUGR) during the antenatal period.                          | BCPDR |
|                                              | Baby may or may not be appropriately grown at birth.                                                                         |       |
| Gestational Hypertension                     |                                                                                                                              |       |
|                                              | Care provider diagnosed mother with gestational hypertension during the current pregnancy.                                   | BCPDR |
| Gestational Diabetes                         |                                                                                                                              |       |
|                                              | Gestational diabetes, insulin dependent.                                                                                     | BCPDR |
|                                              | Gestational diabetes, non-insulin dependent.                                                                                 |       |
| Proteinuria                                  |                                                                                                                              |       |
|                                              | Care provider diagnosed proteinuria (>+1g/L) during the current pregnancy.                                                   | BCPDR |
| Alcohol use                                  |                                                                                                                              |       |
|                                              | Care provider lists mother's use of alcohol as a risk factor in this pregnancy.                                              | BCPDR |

---

|                             |                                                                                                                                                                                                |       |
|-----------------------------|------------------------------------------------------------------------------------------------------------------------------------------------------------------------------------------------|-------|
|                             | Mother used any of the following substances at any time during the current pregnancy:                                                                                                          |       |
| Substance use               | heroin/opioids, cocaine, methadone, solvents, or marijuana; OR care provider lists use of prescription, 'other', or unknown other drug as a risk to the pregnancy.                             | BCPDR |
| Smoking                     | Mother smoked tobacco products during pregnancy.                                                                                                                                               | BCPDR |
| Gestational age at delivery | Algorithm-based estimate of gestational age at delivery. Uses last menstrual period, first ultrasound (<20 weeks), clinical estimate from newborn exam, and documentation from maternal chart. | BCPDR |
| HELLP syndrome              | Mother was diagnosed with HELLP Syndrome (H-hemolysis, EL-elevated liver enzymes, LP-low platelet count)                                                                                       | BCPDR |

---

<sup>a</sup>Ultrasound diagnosed intra-uterine growth restriction (IUGR)

Supplemental Table 2. Rates of HELLP syndrome by Body-Mass-Index category and hazard ratios with 95% confidence intervals

|                                          | Underweight      | Normal BMI | Overweight       | Obese            |
|------------------------------------------|------------------|------------|------------------|------------------|
| <i>All pregnancies</i>                   |                  |            |                  |                  |
| N cases (rate per thousand) <sup>a</sup> | 43 (1.9)         | 587 (2.5)  | 272 (3.2)        | 214 (4.0)        |
| Crude HR <sup>b</sup>                    | 0.78 (0.57-1.06) | Ref        | 1.29 (1.12-1.49) | 1.62 (1.39-1.90) |
| <i>Early-onset HELLP (&lt; 34 wks)</i>   |                  |            |                  |                  |
| N cases (rate per thousand) <sup>a</sup> | 8 (0.4)          | 125 (0.5)  | 73 (0.9)         | 69 (1.3)         |
| Crude HR <sup>b</sup>                    | 0.66 (0.32-1.35) | Ref        | 1.62 (1.21-2.16) | 2.37 (1.77-3.18) |
| <i>Late-onset HELLP (≥ 34 wks)</i>       |                  |            |                  |                  |
| N cases (rate per thousand) <sup>a</sup> | 35 (1.6)         | 462 (2.0)  | 199 (2.4)        | 145 (2.8)        |
| Crude HR <sup>b</sup>                    | 0.81 (0.57-1.14) | Ref        | 1.21 (1.02-1.42) | 1.42 (1.17-1.71) |

<sup>a</sup>Rates are per 1000 ongoing pregnancies at 20 weeks (early-onset HELLP) and at 34 weeks gestation (late-onset HELLP).

<sup>b</sup>HR = hazard ratio, with 95% confidence interval in parentheses, unless otherwise specified

Supplemental Table 3. Maternal demographic and clinical characteristics by early- vs late-onset HELLP syndrome; British Columbia,

2008/09-2019/20<sup>a</sup>

|                            | Early-onset HELLP<br>n =275 | Late-onset HELLP<br>n = 841 |
|----------------------------|-----------------------------|-----------------------------|
| Pre-pregnancy BMI category |                             |                             |
| Underweight                | 8 (2.9)                     | 35 (4.2)                    |
| Normal weight              | 125 (45.5)                  | 462 (54.9)                  |
| Overweight                 | 73 (26.6)                   | 199 (23.7)                  |
| Obese                      | 69 (25.1)                   | 145 (17.2)                  |
| Maternal age (years)       |                             |                             |
| < 25                       | 30 (10.9)                   | 97 (11.5)                   |
| 25-34                      | 158 (57.5)                  | 512 (60.9)                  |
| ≥ 35                       | 87 (31.6)                   | 232 (27.6)                  |
| Nullipara                  | 188 (68.4)                  | 629 (74.8)                  |
| Chronic diabetes           | 6 (2.2)                     | 14 (1.7)                    |

|                                                |           |           |
|------------------------------------------------|-----------|-----------|
| Chronic hypertension                           | 19 (6.9)  | 20 (2.4)  |
| Prior stillbirth /neonatal death <sup>b</sup>  | <5 (<1.8) | <5 (<0.5) |
| IVF conception <sup>c</sup>                    | 19 (6.9)  | 73 (8.7)  |
| Multiple gestation                             | 33 (12.0) | 91 (10.8) |
| Bleeding (< 20 weeks)                          | 12 (4.4)  | 10 (1.2)  |
| Antepartum bleeding/hemorrhage (≥<br>20 weeks) | 15 (5.5)  | 12 (1.4)  |
| Alcohol use <sup>b</sup>                       | <5 (<1.8) | 10 (1.2)  |
| Substance use                                  | 14 (5.1)  | 25 (3.0)  |
| Smoking                                        | 14 (5.1)  | 36 (4.3)  |

---

<sup>a</sup>Data shown as n(%)

<sup>b</sup>Information on cell numbers <5 was suppressed due to confidentiality reasons.

<sup>c</sup>IVF = in vitro fertilization

Supplemental Table 4. Cases of HELLP syndrome at each gestational age (rate per 1000 ongoing pregnancies)<sup>a</sup>

| Gestational age<br>(weeks) | Underweight<br>n = 22,392 | Normal BMI<br>n = 231,517 | Overweight<br>n = 83,864 | Obese<br>n = 54,168 |
|----------------------------|---------------------------|---------------------------|--------------------------|---------------------|
| 20-21                      | <5/22392 (<0.22)          | <5/231517 (<0.02)         | <5/83864 (<0.06)         | <5/54168 (<0.09)    |
| 22-23                      | <5/22379 (<0.22)          | <5/231351 (<0.02)         | <5/83796 (<0.06)         | <5/54108 (<0.09)    |
| 24-25                      | <5/22356 (<0.22)          | 6/231174 (0.03)           | <5/83720 (<0.06)         | 5/54023 (0.09)      |
| 26-27                      | <5/22332 (<0.22)          | 14/230958 (0.06)          | 8/83609 (0.10)           | 6/53926 (0.11)      |
| 28-29                      | <5/22289 (0.04)           | 16/230635 (0.07)          | 14/83471 (0.17)          | 6/53810 (0.11)      |
| 30-31                      | <5/22232 (0.13)           | 22/230136 (0.10)          | 18/83269 (0.22)          | 23/53631 (0.43)     |
| 32-33                      | <5/22133 (0.14)           | 66/229249 (0.29)          | 29/82870 (0.35)          | 27/53303 (0.51)     |
| 34-35                      | 10/21902 (0.46)           | 116/227212 (0.51)         | 58/81998 (0.71)          | 42/52652 (0.80)     |
| 36-37                      | 13/21247 (0.61)           | 154/221075 (0.70)         | 70/79515 (0.88)          | 55/50825 (1.08)     |
| 38-39                      | 11/17845 (0.62)           | 131/189757 (0.69)         | 56/66951 (0.84)          | 36/40911 (0.88)     |
| ≥ 40                       | <5/6278 (<0.80)           | 61/73662 (0.83)           | 15/26327 (0.57)          | 12/15135 (0.79)     |

<sup>a</sup>Information on cell numbers <5 was suppressed due to confidentiality reasons.

## Supplemental Table 5. Demographic and clinical characteristics of women missing pre-pregnancy BMI, live births and stillbirths, British

Columbia, 200/09-2019/20<sup>a</sup>

|                                  | BMI not missing | BMI missing  |
|----------------------------------|-----------------|--------------|
|                                  | n = 391,941     | n = 132,536  |
| Maternal age (years)             |                 |              |
| < 25                             | 47030 (12.0)    | 20134 (15.2) |
| 25-34                            | 247268 (63.1)   | 78660 (59.4) |
| ≥ 35                             | 97643 (24.9)    | 33742 (25.5) |
| Nullipara                        | 189513 (48.4)   | 53789 (40.6) |
| Pre-existing diabetes            | 2397 (0.6)      | 913 (0.7)    |
| Chronic hypertension             | 2847 (0.7)      | 890 (0.7)    |
| Prior stillbirth /neonatal death | 3794 (1.0)      | 1734 (1.3)   |
| IVF conception <sup>b</sup>      | 11549 (3.0)     | 3877 (2.9)   |
| Multiple gestation               |                 |              |
| Twins                            | 5806 (1.5)      | 2478 (1.9)   |



|                                              |              |              |
|----------------------------------------------|--------------|--------------|
| Triplets/Quadruplets                         | 82 (0)       | 27 (0)       |
| Antepartum bleeding/hemorrhage               |              |              |
| < 20 weeks                                   | 7337 (1.9)   | 1813 (1.4)   |
| ≥ 20 weeks                                   | 5659 (1.4)   | 1496 (1.1)   |
| Intrauterine Growth Restriction <sup>c</sup> | 8857 (2.3)   | 2471 (1.9)   |
| Gestational Hypertension                     | 21124 (5.4)  | 6623 (5.0)   |
| Gestational Diabetes                         | 44172 (11.3) | 13248 (10.0) |
| Proteinuria                                  | 21124 (5.4)  | 6623 (5.0)   |
| Alcohol use                                  | 4162 (1.1)   | 1845 (1.4)   |
| Substance use                                | 15701 (4.0)  | 6758 (5.1)   |
| Smoking                                      | 26401 (6.7)  | 10435 (7.9)  |
| Second-hand smoke                            | 26319 (6.7)  | 7565 (5.7)   |

---

<sup>a</sup>Data shown as n(%)

<sup>b</sup>IVF = in vitro fertilization

<sup>c</sup>Ultrasound diagnosed intra-uterine growth restriction (IUGR)

Supplemental Table 6. Hazard Ratios and 95% confidence intervals using imputed data for missing values of BMI

|                                          | Underweight      | Normal BMI | Overweight       | Obese            |
|------------------------------------------|------------------|------------|------------------|------------------|
| Early-onset HELLP (< 34 wks)             |                  |            |                  |                  |
| N cases (rate per thousand) <sup>a</sup> | 8 (0.4)          | 164 (0.5)  | 137 (0.9)        | 71 (1.3)         |
| Adjusted HR <sup>b</sup>                 | 0.76 (0.43-1.33) | Ref        | 1.54 (1.19-2.00) | 2.06 (1.53-2.78) |
| Late-onset HELLP (≥ 34 wks)              |                  |            |                  |                  |
| N cases (rate per thousand) <sup>a</sup> | 35 (1.6)         | 572 (1.9)  | 376 (2.6)        | 148 (2.8)        |
| Adjusted HR <sup>b</sup>                 | 0.96 (0.51-1.8)  | Ref        | 1.24 (0.92-1.66) | 1.46 (1.03-2.08) |

<sup>a</sup>Rates are per 1000 ongoing pregnancies at 20 weeks (early-onset HELLP syndrome) and at 34 weeks gestation (late-onset HELLP syndrome).

<sup>b</sup>HR = hazard ratio, with 95% confidence interval in parentheses, unless otherwise specified. Adjusted for nulliparity, maternal age, chronic diabetes, chronic hypertension, in vitro fertilization, antepartum bleeding/hemorrhage, gestational diabetes, alcohol, substance use, smoking during pregnancy, prior pregnancy outcomes, and multiple gestation.
